# Supplementary material
Source: PubMed Central journal article supplement (PMC3147474)
Supplement: supp_77_15_5361__1.pdf [file supp_77_15_5361__1.pdf]

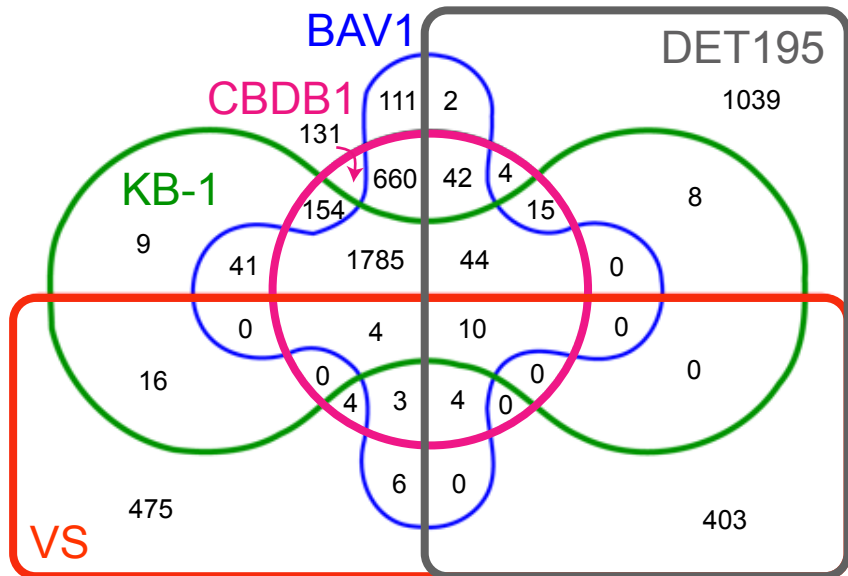

Figure S1: Venn diagram depicting the number of genes covered by the pan-genome probe set for specific genome combinations.

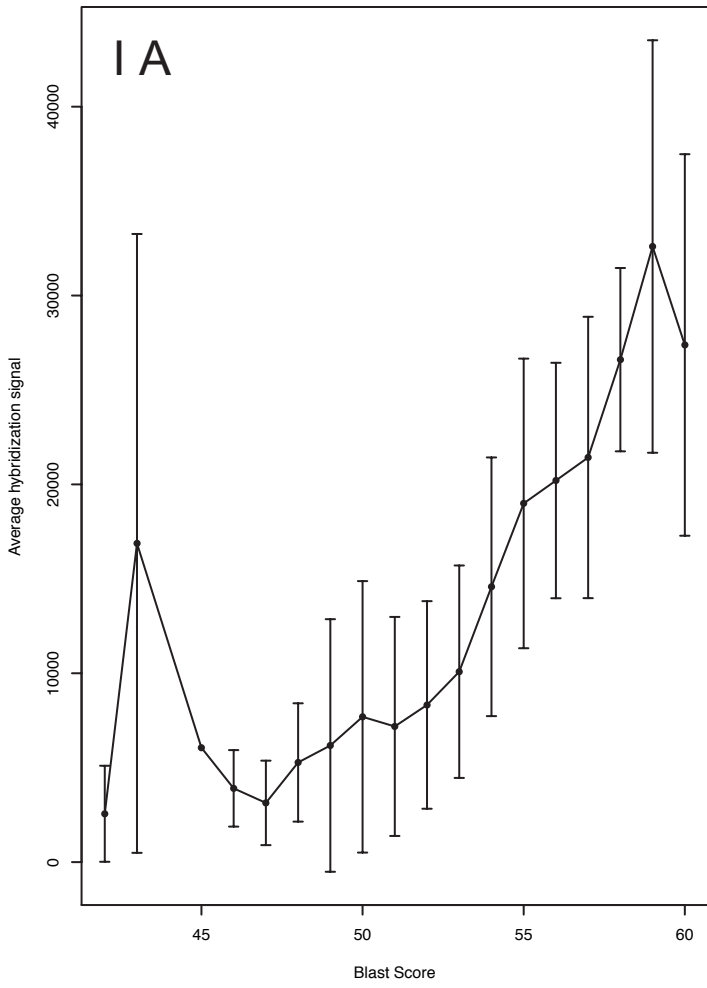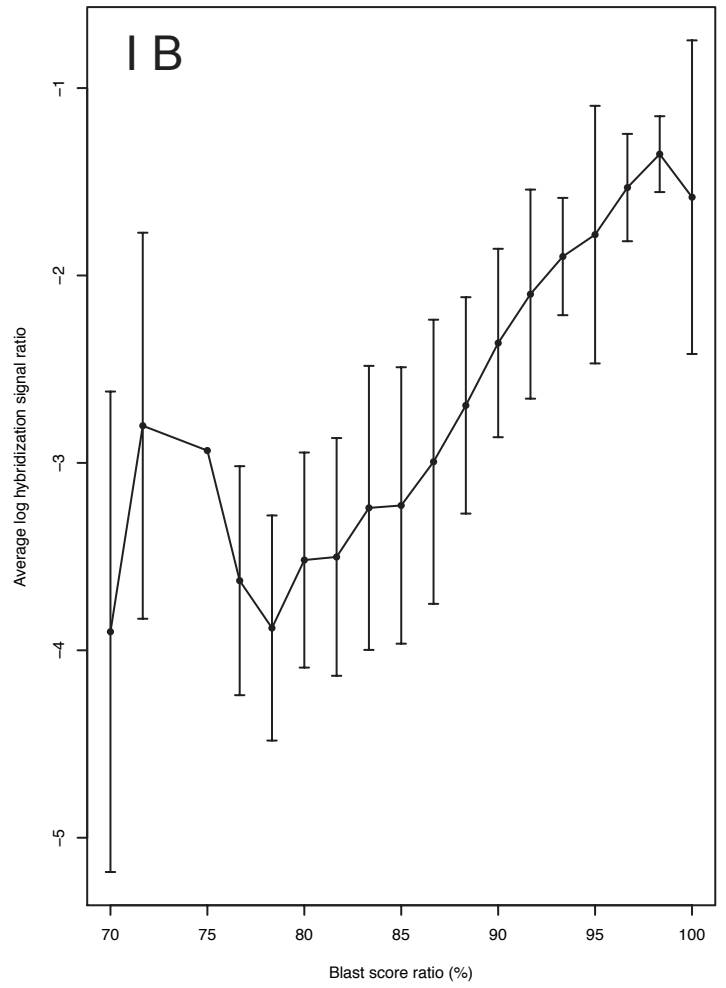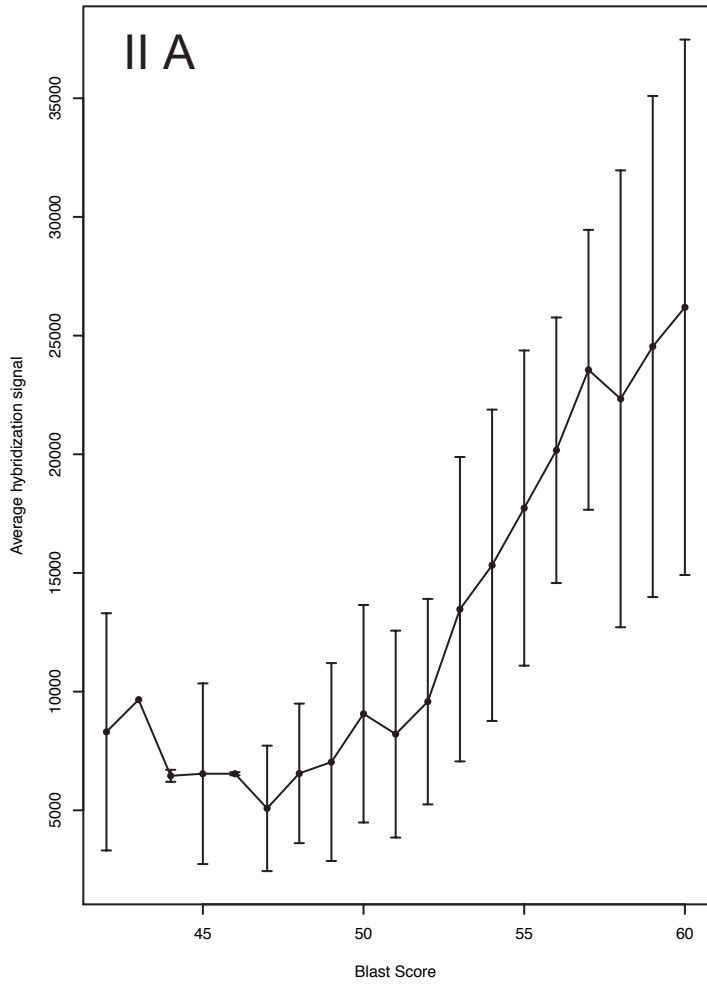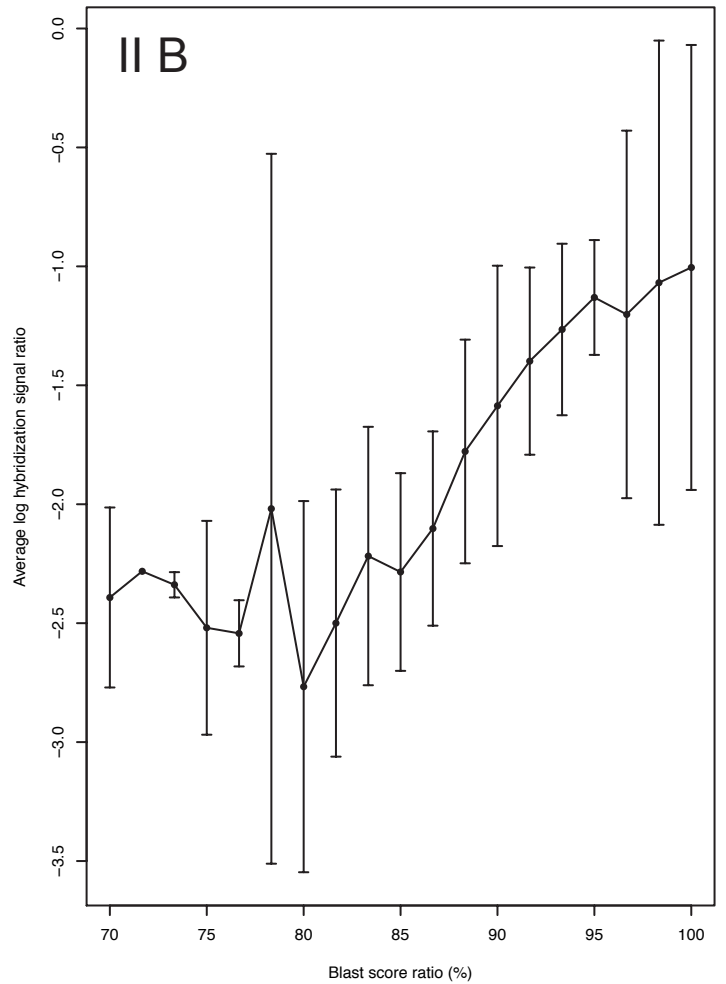

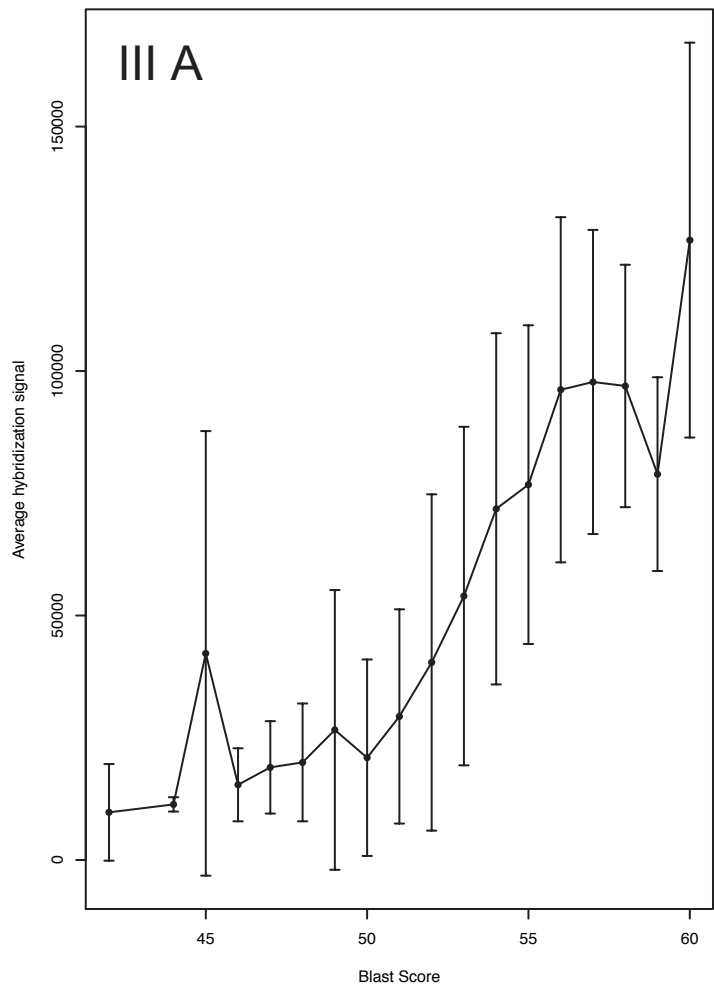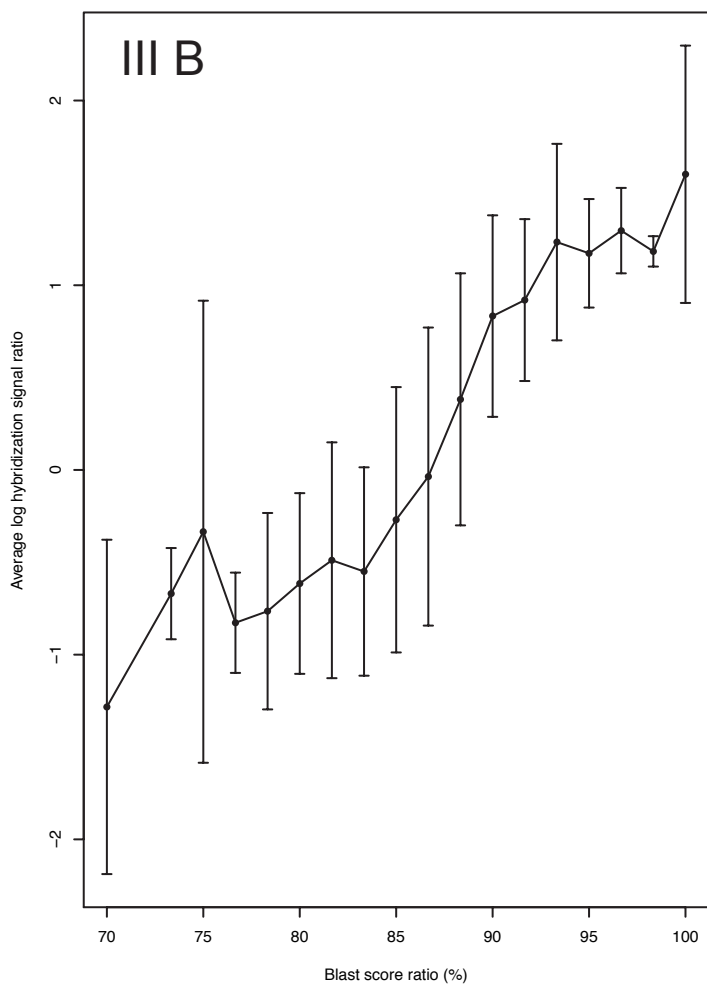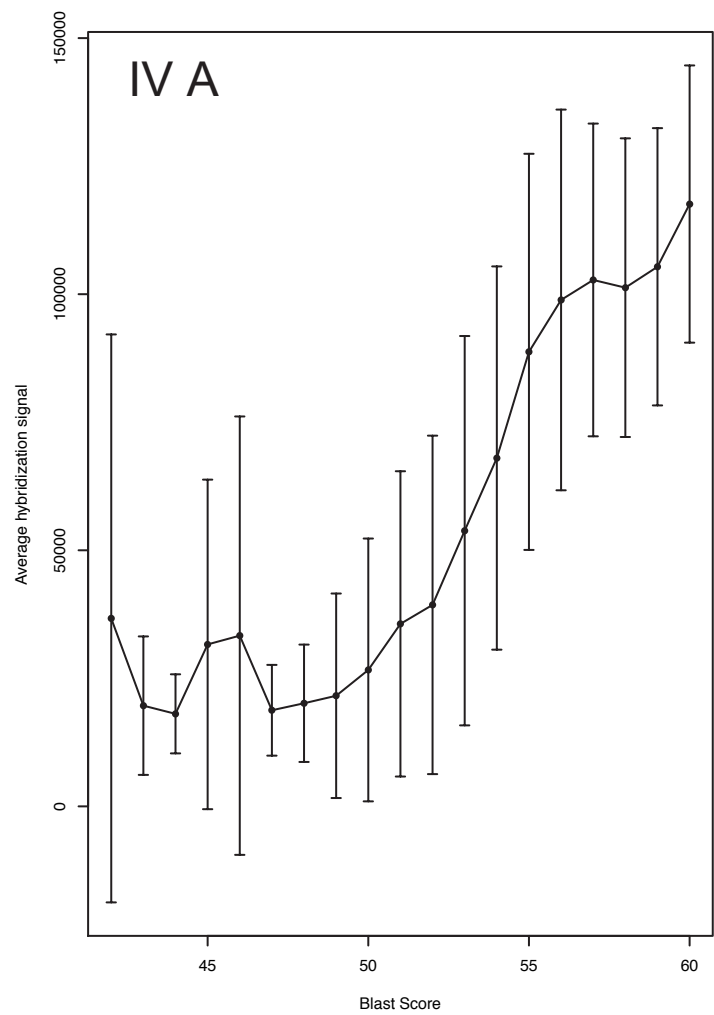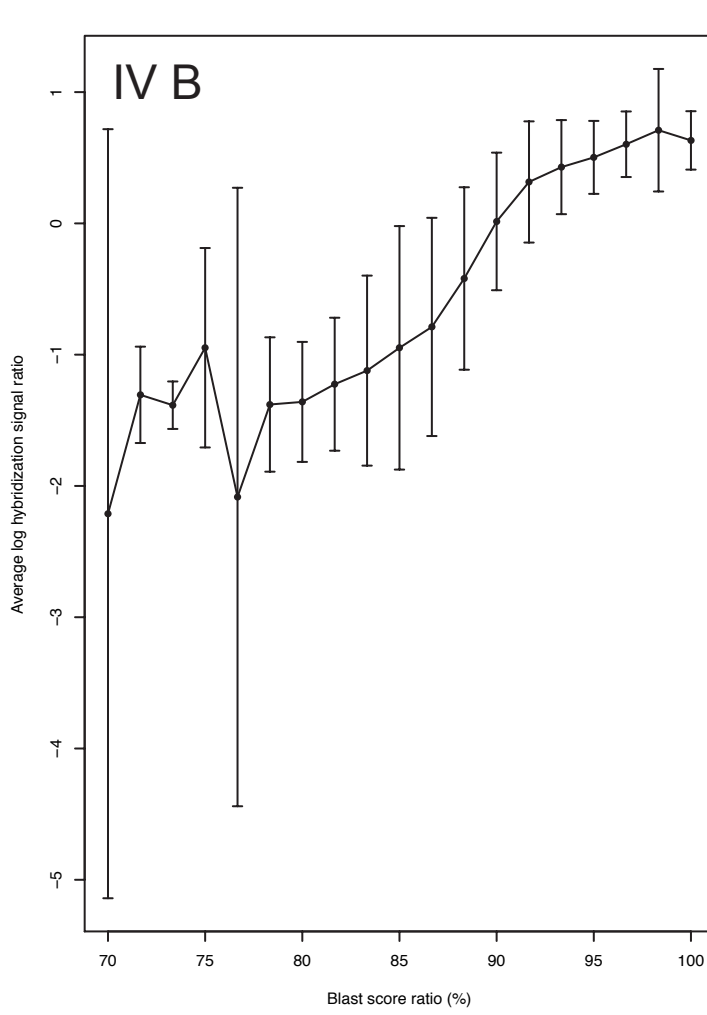

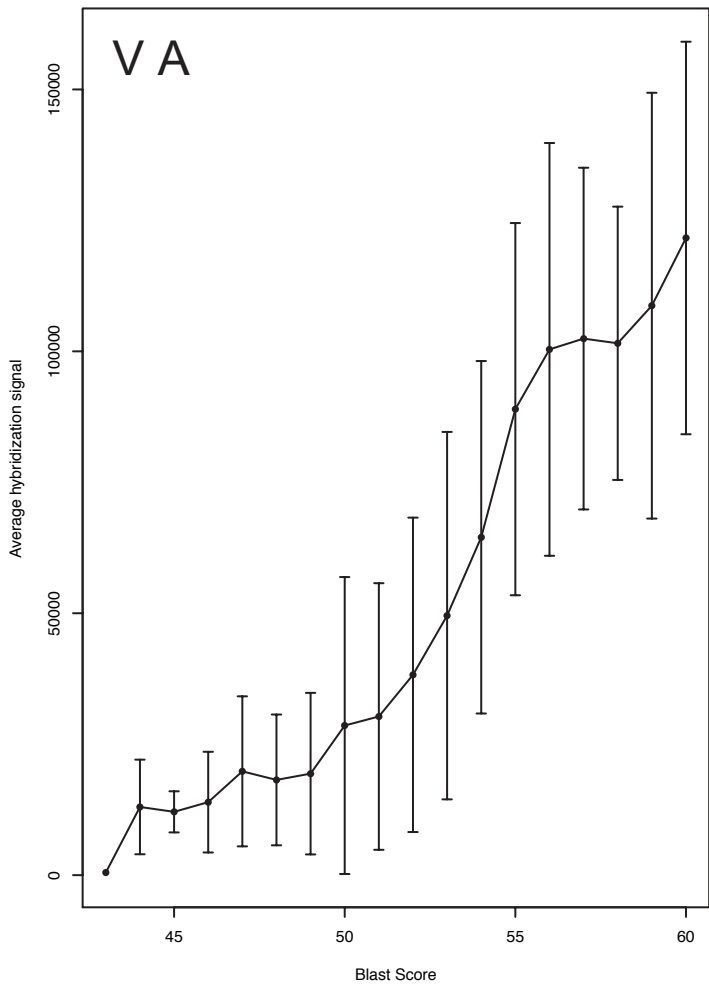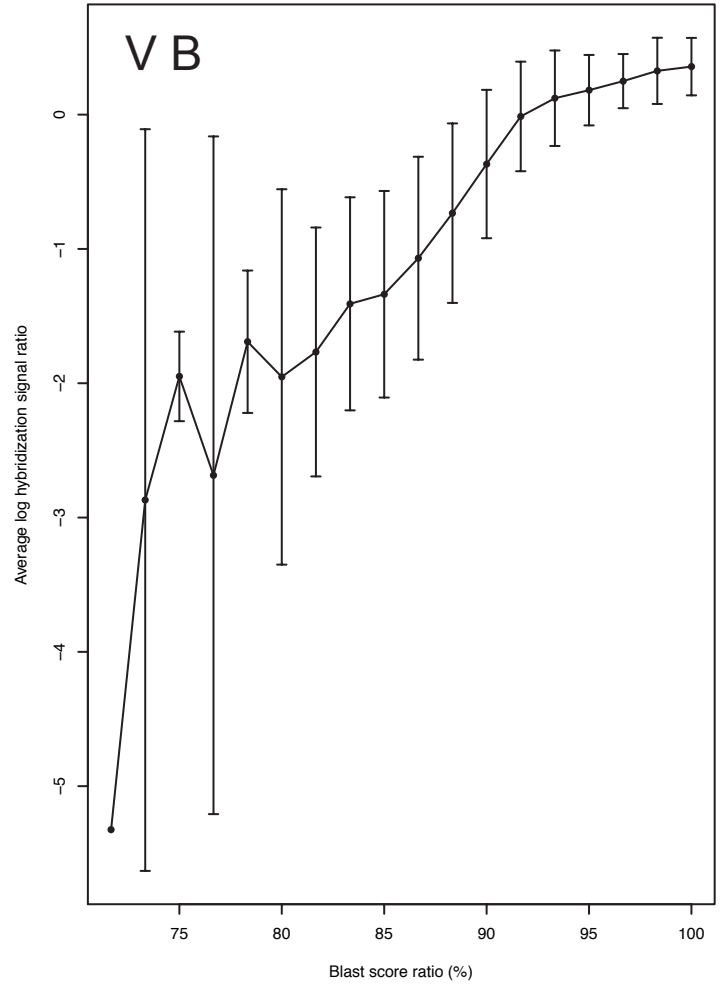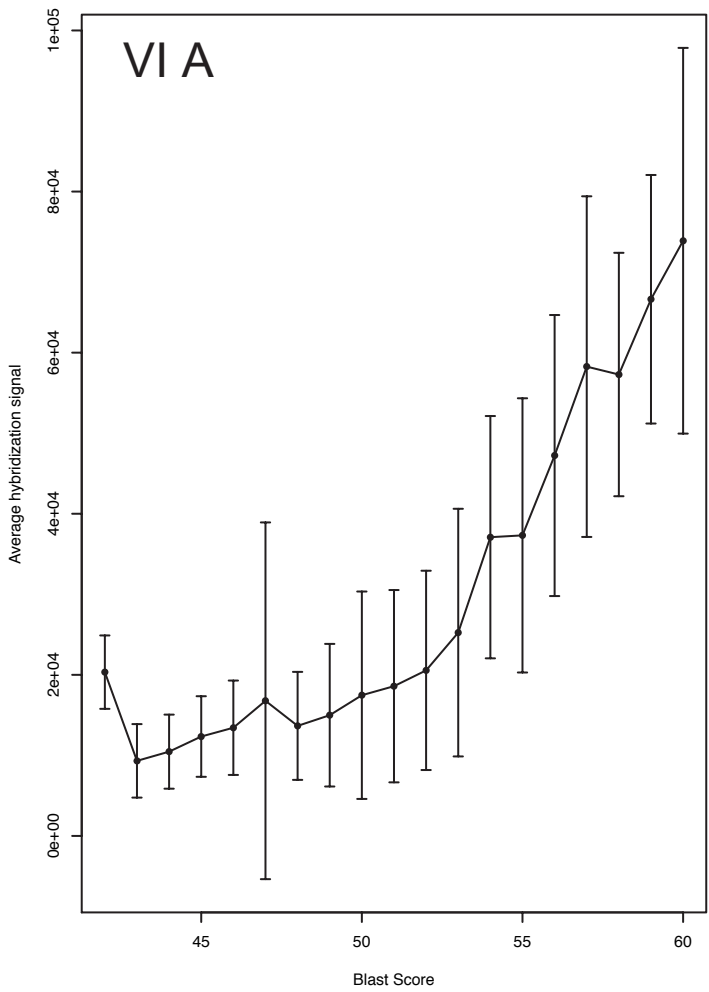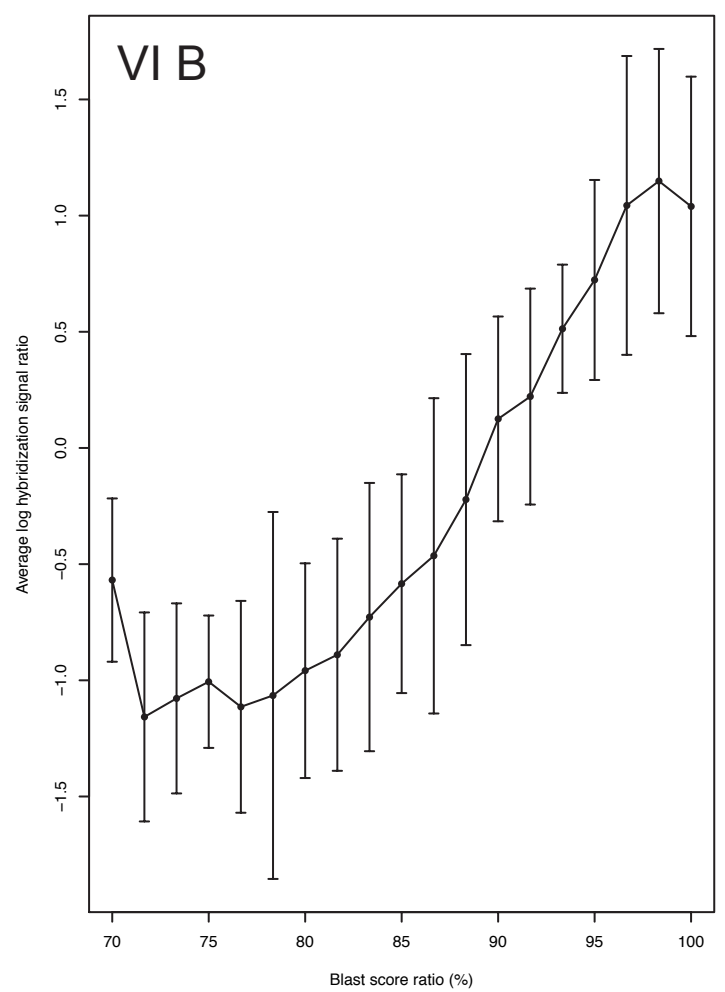

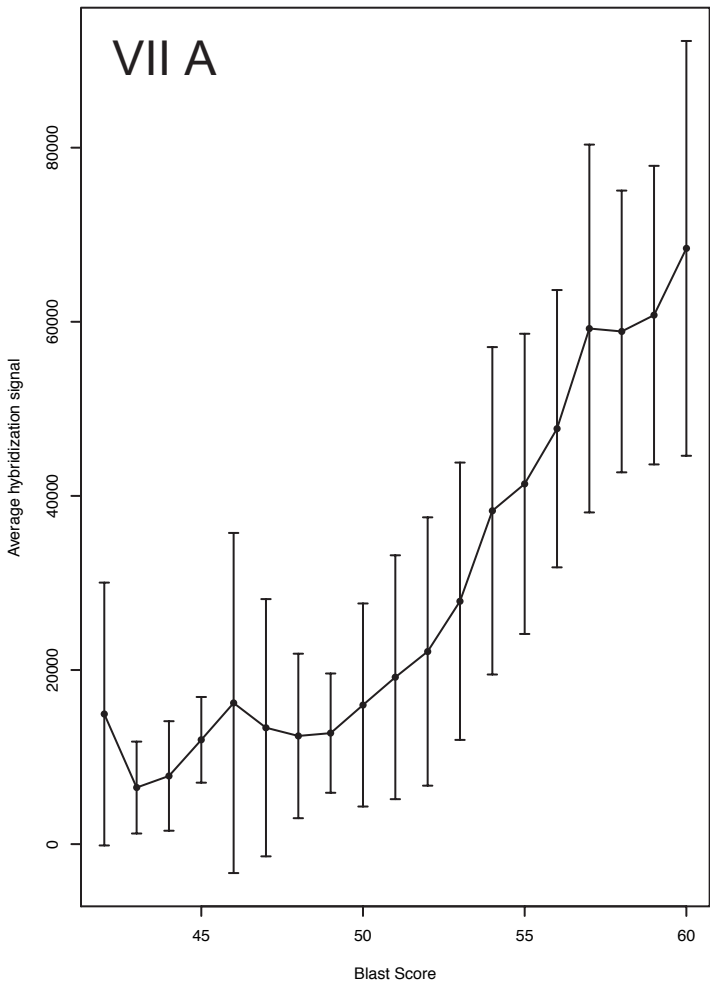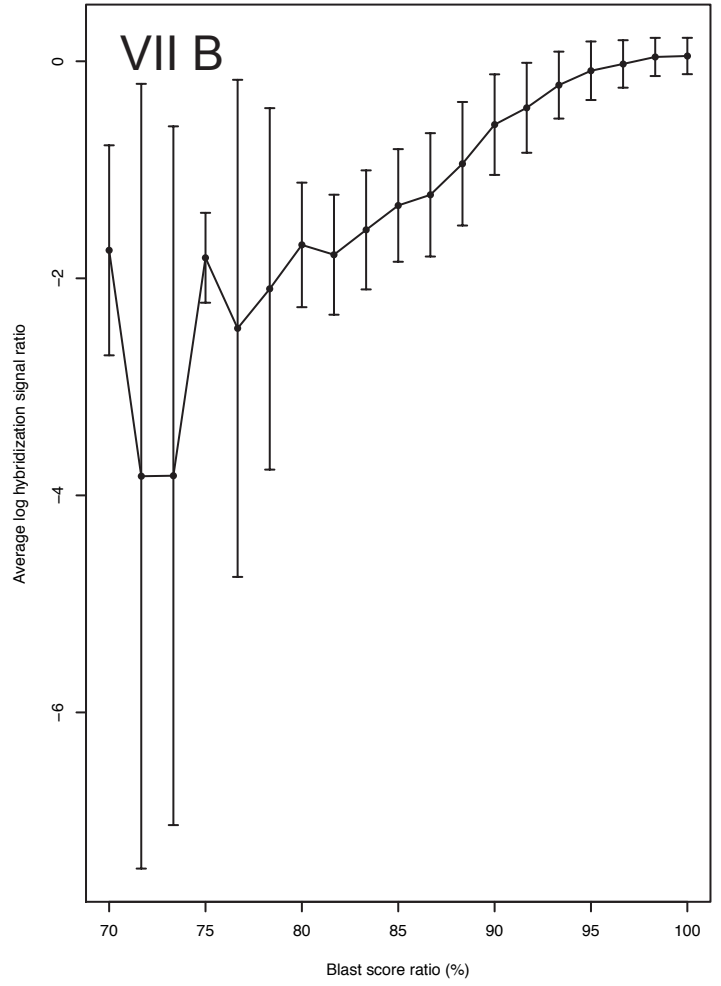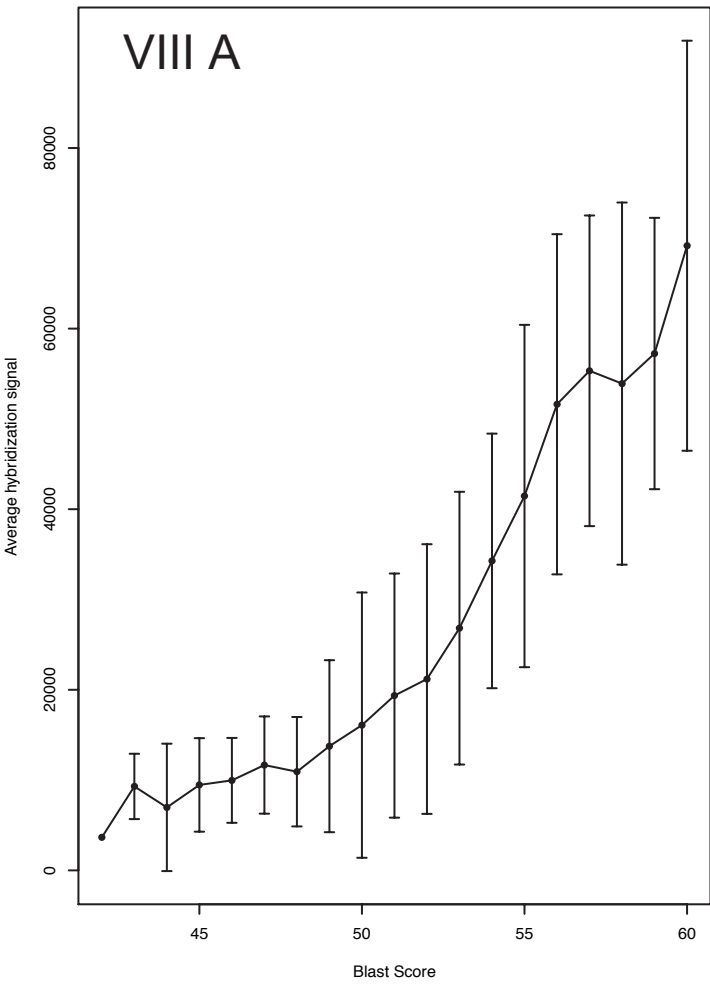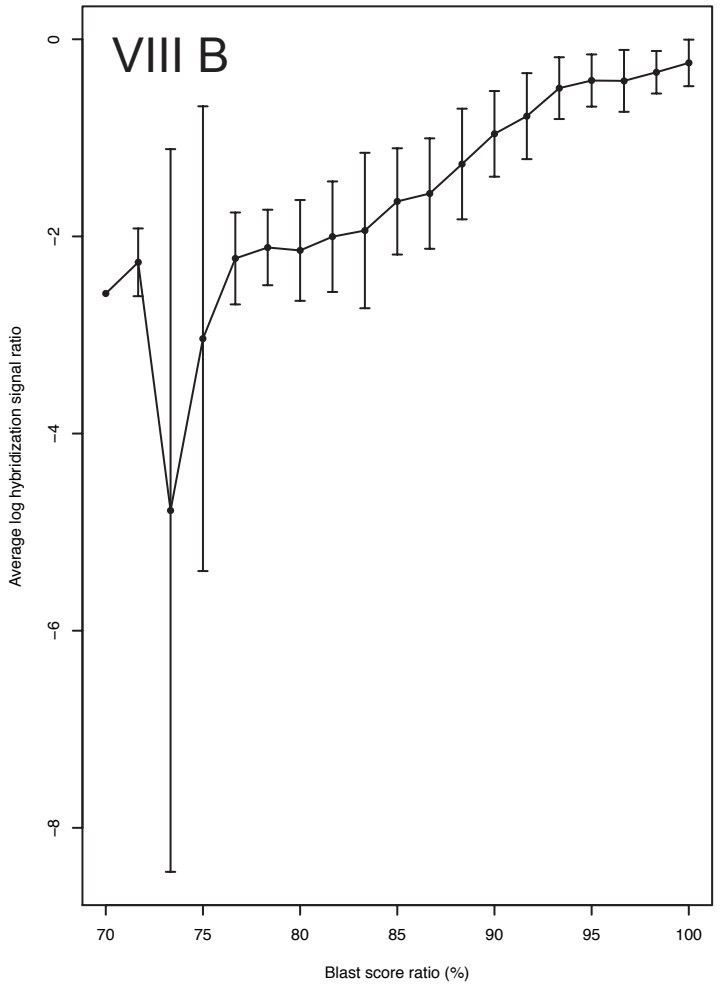

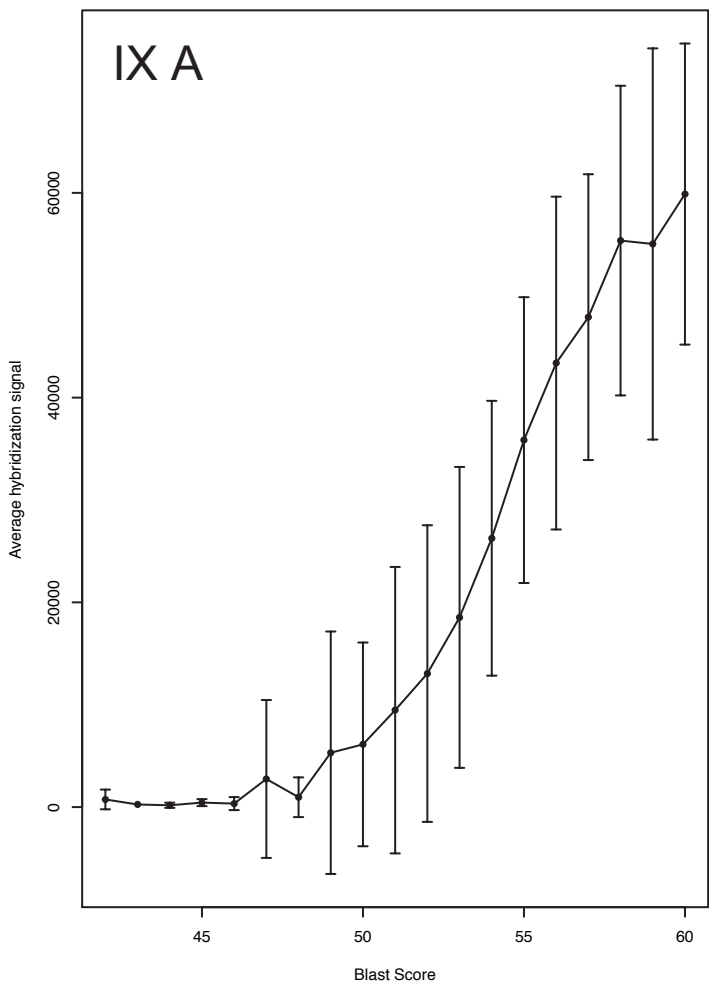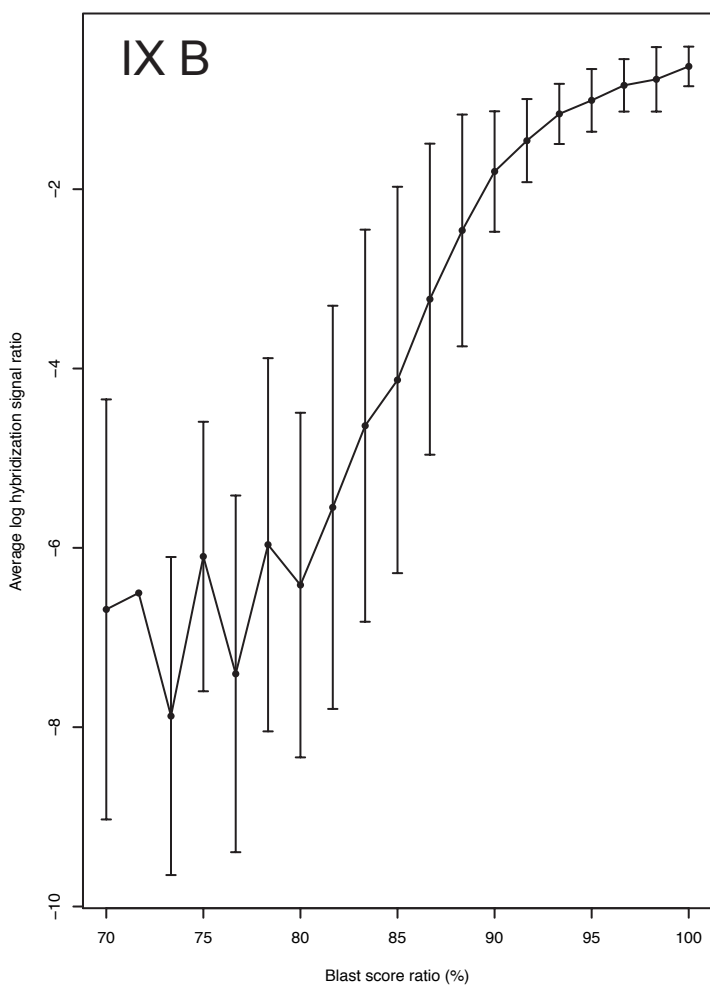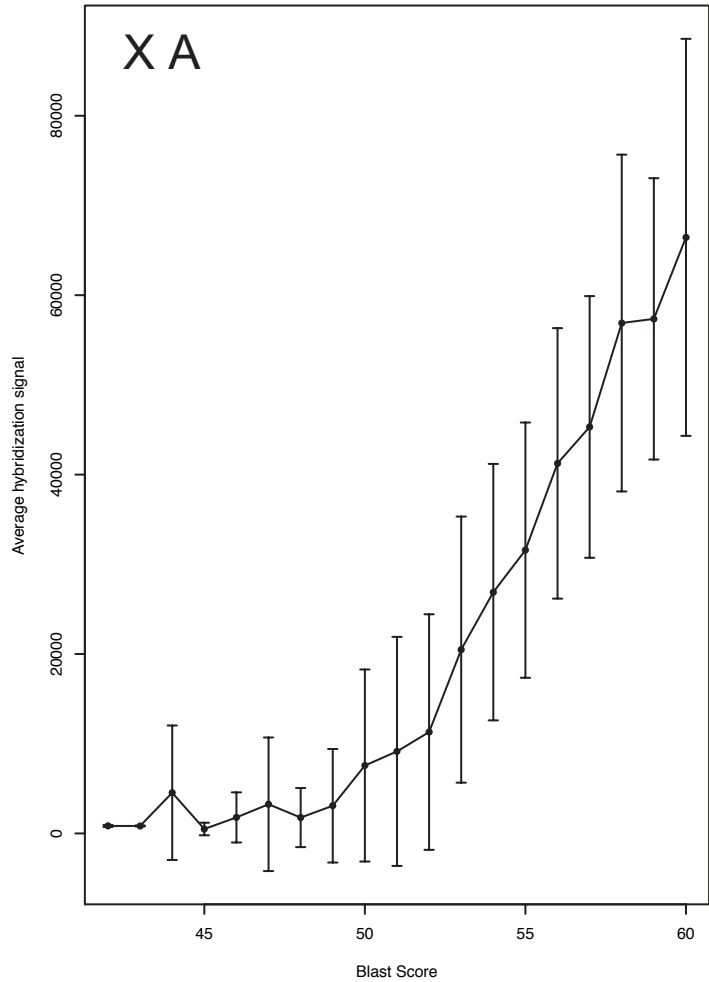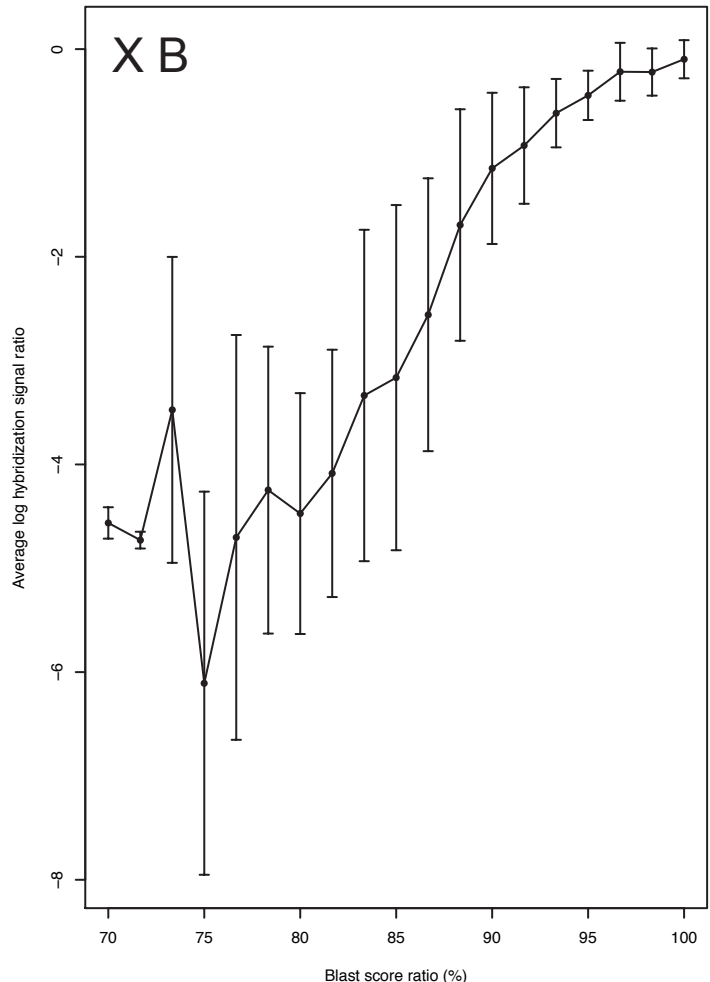

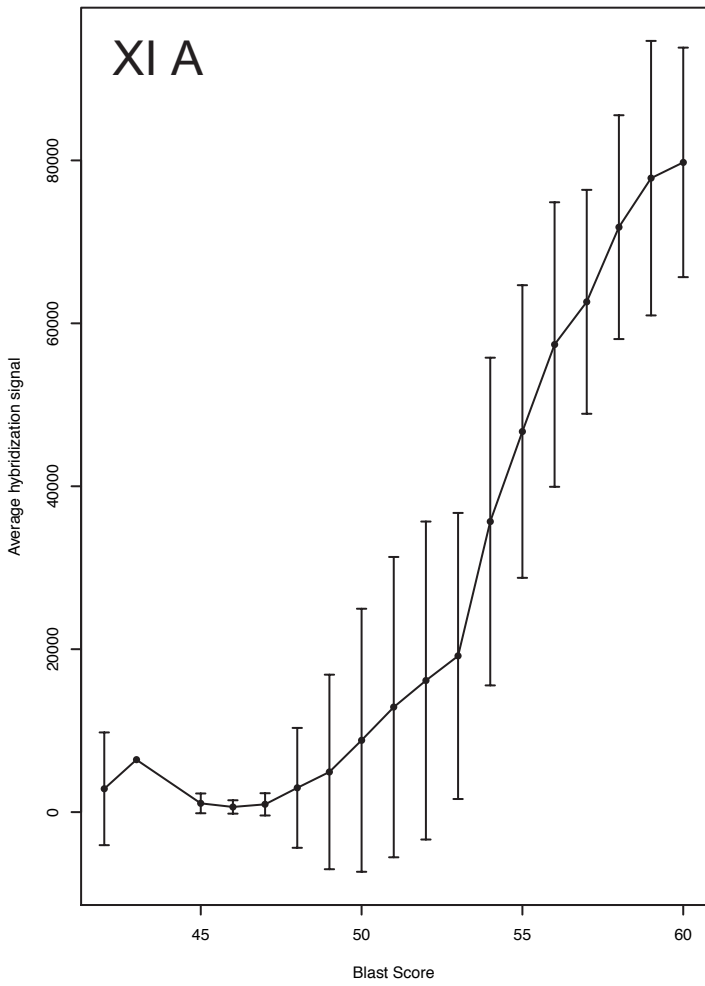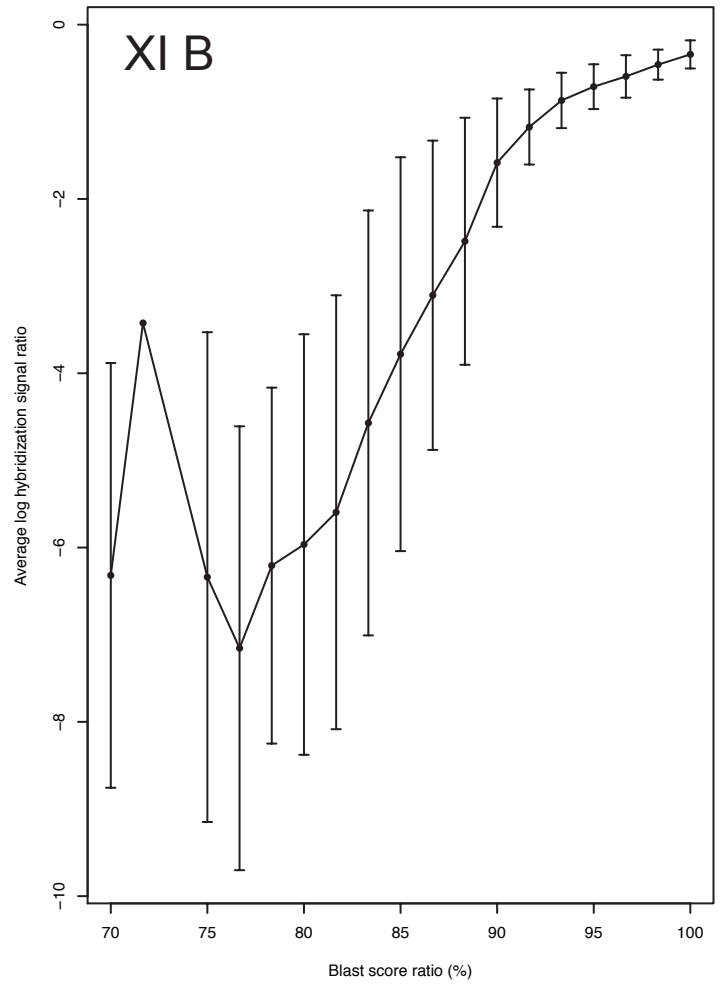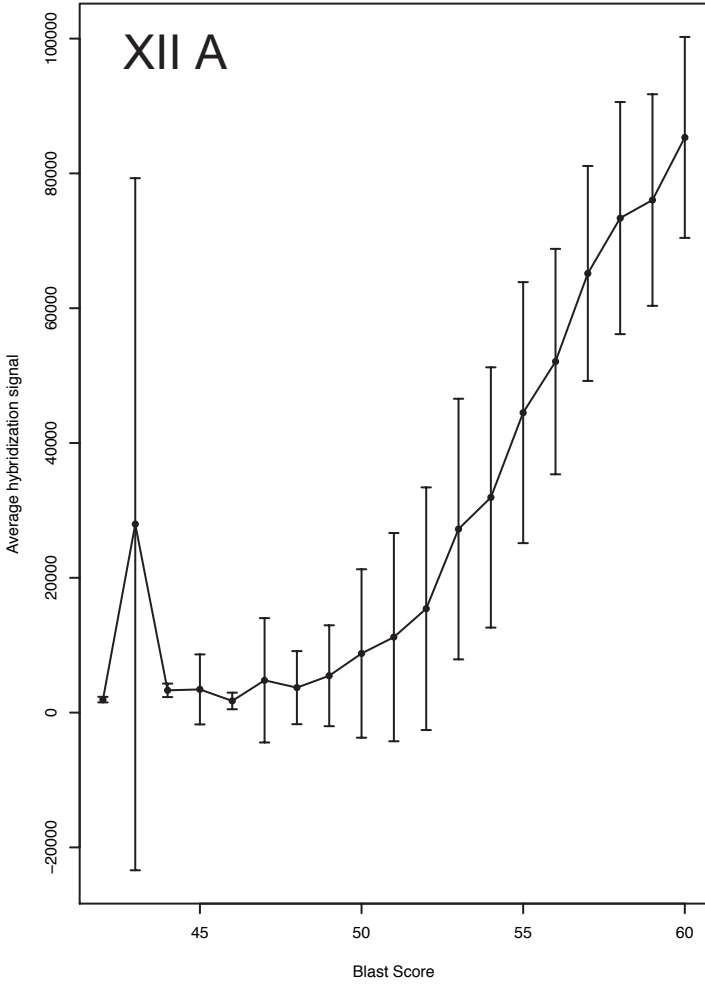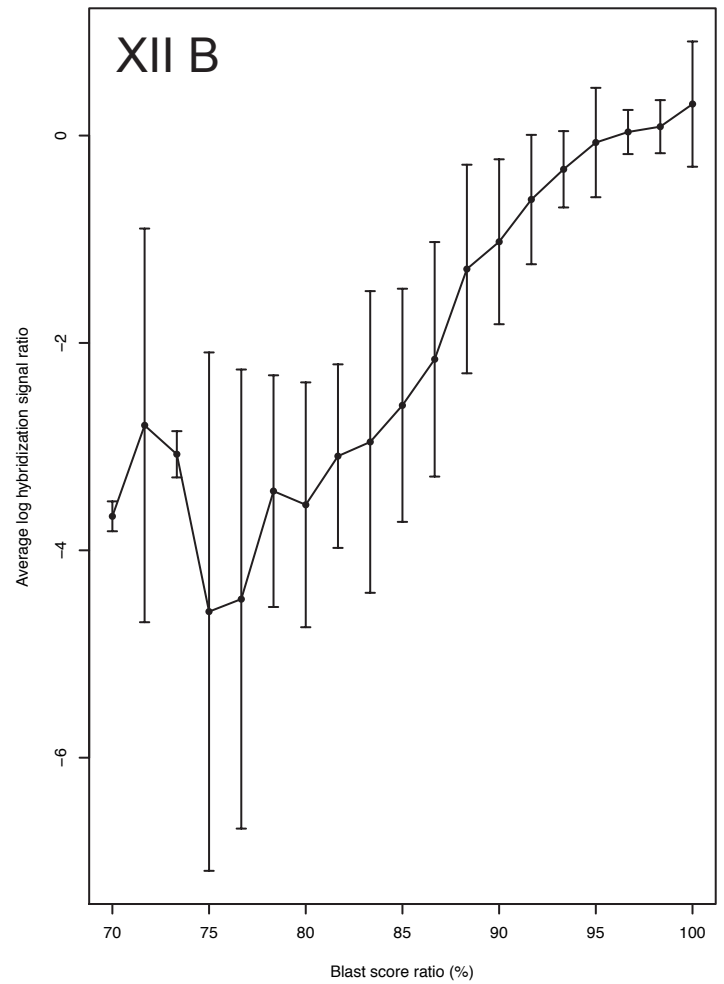

Figure S2: Determination of fluorescence intensity signal threshold using blast score ratio statistics adapted from Oh *et al.* Appl Environ Microbiol 76:2980-2988, 2010, for the 12 possible genome pairwise comparisons given an ANI of 90% or lower. For each tester:reference genome pair, the plots indicate the following: A: Blast score of probes against non-target genome sequences vs. average fluorescence intensity signal. B: Blast score ratio of probes against non-target genomes over probes against reference genome vs the average log(signal intensity ratio for non-target over reference genomes). Error bars represent mean  $\pm$  3x the standard deviation of intensity.

Tester vs. reference genome pairs are as follows:

- I - KB1 vs. VS
- II - KB1 vs. DET195
- III - VS vs. KB1
- IV - VS vs. CBDB1
- V - VS vs. BAV1
- VI - DET195 vs. KB1
- VII - DET195 vs. CBDB1
- VIII - DET195 vs. BAV1
- IX - CBDB1 vs. VS
- X - CBDB1 vs. DET195
- XI - BAV1 vs. VS
- XII - BAV1 vs. DET195



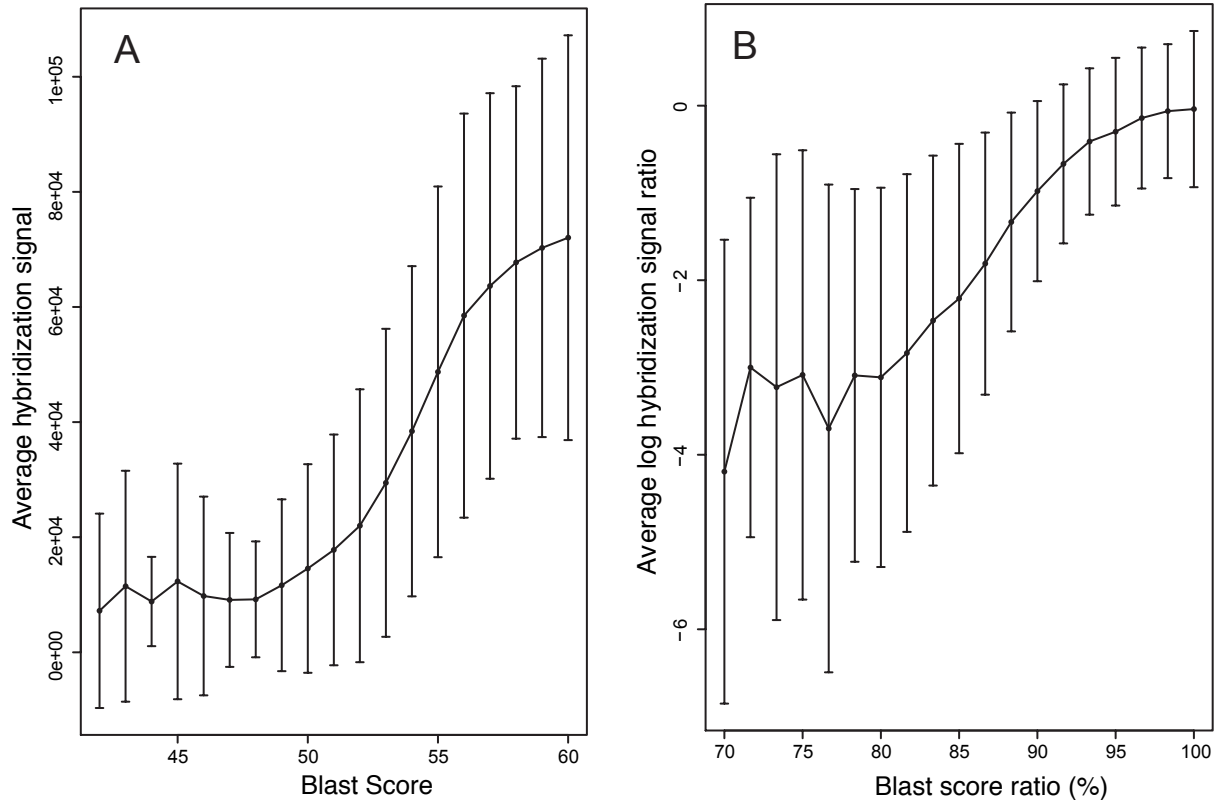

Figure S3: Determination of fluorescence intensity signal threshold using blast score ratio statistics adapted from Oh *et al.* Appl Environ Microbiol 76:2980-2988, 2010, for the 12 possible genome pairwise comparisons given an ANI of 90% or lower (Table S3). All individual pairs were examined and the data merged to provide average values across the 12 permutations. A: Blast score of probes against non-target genome sequences vs. average fluorescence intensity signal. B: Blast score ratio of probes against non-target genomes over probes against reference genome vs the average log(signal intensity ratio for non-target over reference genomes). Error bars represent mean  $\pm 3$  the standard deviation of intensity.
